# Supplementary material for: Aromatic Plants and Their Associated Arbuscular Mycorrhizal Fungi Outcompete Tuber melanosporum in Compatibility Assays with Truffle-Oaks
Source: MDPI journal article supplement (doi:10.3390/biology12040628), 2023-04-20
Supplement: s1 [file s1]

Supplementary Material

# Aromatic plants and their associated arbuscular mycorrhizal fungi outcompete *Tuber melanosporum* in compatibility assays with truffle-oaks.

Vasiliki Barou, Ana Rincón, Cinta Calvet, Amelia Camprubí and Javier Parladé

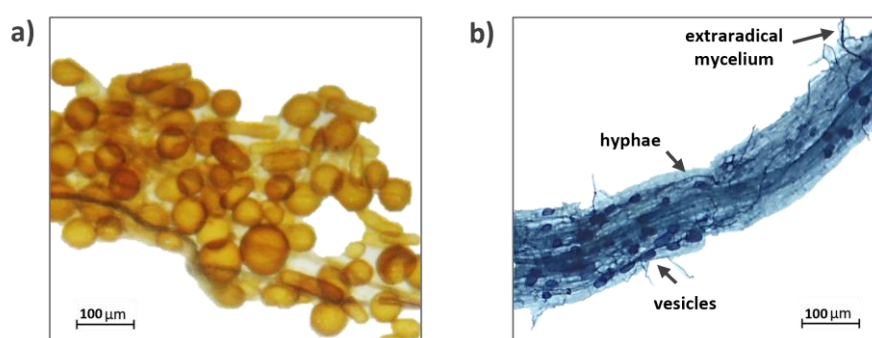

**Figure S1.** Stereomicroscope photographs of arbuscular mycorrhizal fungi (AMF) structures **(a)** Inoculum of *Glomus* spp.-type spores isolated from native plants within the brûlés. **(b)** Root fragment of mycorrhizal lavender stained with trypan blue.

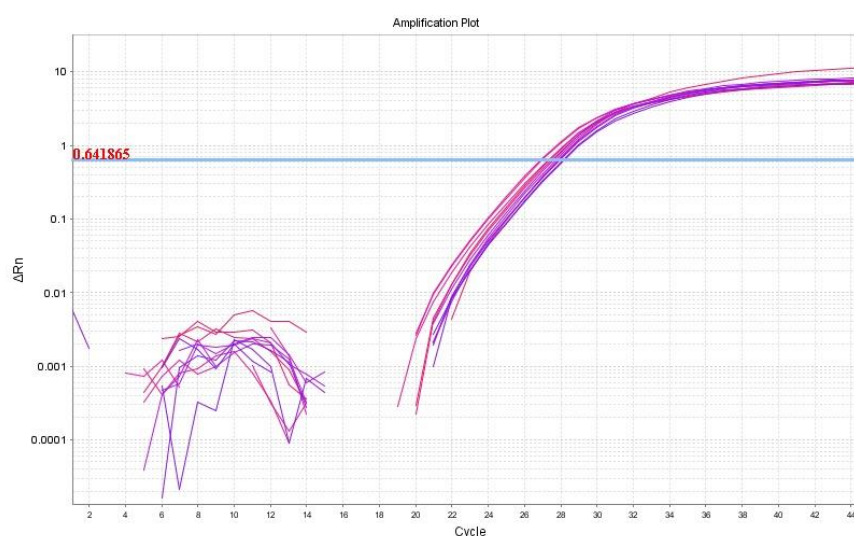

**Figure S2.** Amplification plot of fungal ITS1 multicopy gene. DNA samples from different treatments and different initial DNA concentrations were fitted to equal concentrations and then assessed in relative qPCR. Despite the unknown number of the initial ITS1 copies of each sample, the ITS1 gene was similarly expressed in all fitted samples. Mean  $C_t$  values in the established threshold (0.641865) was  $27.56 \pm 0.42$  standard deviation.

**Table S1.** Physical-chemical properties of the soil used in the compatibility assays. Organic matter was measured by Walkey-Black method. Elements were determined by spectrophotometry, after ammonium acetate (\*) or diethylenetriaminepentaacetic acid (DTPA) (‡) soil extraction. Texture was determined by the Bouyoucos method.

| Analysis                                                          | Result                    |
|-------------------------------------------------------------------|---------------------------|
| Gravimetric moisture 105°C                                        | <1.000 %                  |
| pH (ext. 1:2.5 v: v, H <sub>2</sub> O)                            | 8.5                       |
| Electrical Conductivity 25°C<br>(ext. 1:5 v: v, H <sub>2</sub> O) | 0.173 dS m <sup>-1</sup>  |
| Organic Matter                                                    | 1.41 %                    |
| N-NO <sub>3</sub>                                                 | 12.9 mg kg <sup>-1</sup>  |
| P (Olsen)                                                         | 9.8 mg kg <sup>-1</sup>   |
| K*                                                                | 149 mg kg <sup>-1</sup>   |
| Ca*                                                               | 7304 mg kg <sup>-1</sup>  |
| Mg*                                                               | 167 mg kg <sup>-1</sup>   |
| Na*                                                               | 27 mg kg <sup>-1</sup>    |
| Fe‡                                                               | 4.505 mg kg <sup>-1</sup> |
| Mn‡                                                               | 5.787 mg kg <sup>-1</sup> |
| Zn‡                                                               | 3.881 mg kg <sup>-1</sup> |
| Cu‡                                                               | 0.322 mg kg <sup>-1</sup> |
| Al‡                                                               | 0.317 mg kg <sup>-1</sup> |
| Pb‡                                                               | 3.256 mg kg <sup>-1</sup> |
| Cd‡                                                               | 0.018 mg kg <sup>-1</sup> |
| Ni‡                                                               | 0.125 mg kg <sup>-1</sup> |
| B‡                                                                | 0.037 mg kg <sup>-1</sup> |
| Sand                                                              | 52 %                      |
| Clay                                                              | 21.4 %                    |
| Lime                                                              | 26.60 %                   |
| Stoniness                                                         | 58.2 %                    |

**Table S2.** Primer pairs tested in this work: specific primers to amplify arbuscular mycorrhizal fungi (AMF) genes and generic fungal primers tested as endogenous control (housekeeping genes) for relative quantification (qPCR  $\Delta\Delta C_T$ ). The asterisks indicate the primers finally used in the experiment for the quantification of AMF relative to the total amount of fungi.

|                           | Primer pairs  | Target gene      | Reference |
|---------------------------|---------------|------------------|-----------|
| <b>AMF specific</b>       | AMG1F/AM1*    | 18S rRNA         | [37]      |
|                           | ITS1F/ITS2*   | ITS1 region      | [66]      |
|                           | GAP_f1/GAP_r3 | GAPDH            | [37]      |
|                           | GH63IF/GH63IR | GH63             | [67]      |
| <b>Endogenous control</b> | SPRYpF/SPRYpR | SPRYp            | [68]      |
|                           | Vps26F/Vps26R | Vps26            | [68]      |
|                           | RasF/RasR     | Ras              | [68]      |
|                           | T1/Bt2b       | $\beta$ -tubulin | [68]      |
|                           | Bt2a/Bt2b     | $\beta$ -tubulin | [68]      |

**Table S3.** Truffle-oak's growth variables. Treatment effect on truffle-oaks growing alone and co-cultured with medicinal aromatic plants either inoculated or non-inoculated with arbuscular

mycorrhizal fungi (AMF). Variables were log ( $\infty$ ) transformed when necessary to meet the requirements to perform the ANOVA analysis (ANCOVA in the case of shoot dry weight), and significant values are highlighted in bold ( $P < 0.05$ ). LMA=Leaf Mass per Area.

| Truffle-oak variables            | term           | df | Sum sq   | Mean sq | F-statistic | p-value           |
|----------------------------------|----------------|----|----------|---------|-------------|-------------------|
| Shoots dry weight <sup>∞</sup>   | treatment      | 6  | 1.715    | 0.286   | 18.704      | <b>&lt;0.0001</b> |
|                                  | initial height | 1  | 0.100    | 0.100   | 6.574       | <b>0.0141</b>     |
|                                  | Residuals      | 41 | 0.626    | 0.015   |             |                   |
| Roots dry weight <sup>∞</sup>    | treatment      | 6  | 0.258    | 0.043   | 1.354       | 0.2554            |
|                                  | Residuals      | 42 | 1.336    | 0.032   |             |                   |
| Shoot to root ratio <sup>∞</sup> | treatment      | 6  | 2.507    | 0.418   | 9.215       | <b>&lt;0.0001</b> |
|                                  | Residuals      | 42 | 1.905    | 0.045   |             |                   |
| Height <sup>∞</sup>              | treatment      | 6  | 0.136    | 0.023   | 5.064       | <b>0.0005</b>     |
|                                  | Residuals      | 42 | 0.188    | 0.004   |             |                   |
| Diameter <sup>∞</sup>            | treatment      | 6  | 0.102    | 0.017   | 3.442       | <b>0.0074</b>     |
|                                  | Residuals      | 42 | 0.208    | 0.005   |             |                   |
| LMA                              | treatment      | 6  | 6.858    | 1.143   | 3.962       | <b>0.0031</b>     |
|                                  | Residuals      | 42 | 12.118   | 0.289   |             |                   |
| Chlorophyll content              | treatment      | 6  | 141.280  | 23.547  | 0.503       | 0.8023            |
|                                  | Residuals      | 42 | 1965.141 | 46.789  |             |                   |

**Table S4.** Medicinal and aromatic plants' (MAPs) growth variables. Effect of arbuscular mycorrhizal fungi (AMF) on inoculated *vs* non-inoculated MAPs co-cultured with truffle-oaks, analysed by ANOVA; significant values are highlighted in bold ( $P < 0.05$ ).

| Species  | MAPs variables      | term      | df | Sum sq  | Mean sq | F-statistic | p-value       |
|----------|---------------------|-----------|----|---------|---------|-------------|---------------|
| Lavender | Shoots dry weight   | AMF       | 1  | 231.227 | 231.227 | 32.116      | <b>0.0001</b> |
|          |                     | Residuals | 12 | 86.397  | 7.200   |             |               |
|          | Roots dry weight    | AMF       | 1  | 23.049  | 23.049  | 4.294       | 0.0605        |
|          |                     | Residuals | 12 | 64.418  | 5.368   |             |               |
|          | Shoot to root ratio | AMF       | 1  | 0.805   | 0.805   | 1.682       | 0.2190        |
|          |                     | Residuals | 12 | 5.744   | 0.479   |             |               |
|          | Height              | AMF       | 1  | 58.018  | 58.018  | 2.244       | 0.1600        |
|          |                     | Residuals | 12 | 310.230 | 25.853  |             |               |
|          | Lavender spikes     | AMF       | 1  | 42.875  | 42.875  | 43.713      | <b>0.0000</b> |
|          |                     | Residuals | 12 | 11.770  | 0.981   |             |               |
| Sage     | Shoots dry weight   | AMF       | 1  | 104.261 | 104.261 | 11.801      | <b>0.0049</b> |
|          |                     | Residuals | 12 | 106.016 | 8.835   |             |               |
|          | Roots dry weight    | AMF       | 1  | 82.889  | 82.889  | 10.693      | <b>0.0067</b> |
|          |                     | Residuals | 12 | 93.021  | 7.752   |             |               |
|          | Shoot to root ratio | AMF       | 1  | 0.131   | 0.131   | 1.378       | 0.2633        |
|          |                     | Residuals | 12 | 1.142   | 0.095   |             |               |
|          | Height              | AMF       | 1  | 103.143 | 103.143 | 9.691       | <b>0.0090</b> |
|          |                     | Residuals | 12 | 127.714 | 10.643  |             |               |
| Thyme    | Shoots dry weight   | AMF       | 1  | 24.314  | 24.314  | 5.004       | <b>0.0450</b> |
|          |                     | Residuals | 12 | 58.307  | 4.859   |             |               |
|          | Roots dry weight    | AMF       | 1  | 26.714  | 26.714  | 3.125       | 0.1025        |
|          |                     | Residuals | 12 | 102.598 | 8.550   |             |               |
|          | Shoot to root ratio | AMF       | 1  | 0.090   | 0.090   | 0.201       | 0.6618        |
|          |                     | Residuals | 12 | 5.368   | 0.447   |             |               |
|          | Height              | AMF       | 1  | 1.341   | 1.341   | 2.036       | 0.1791        |
|          |                     | Residuals | 12 | 7.905   | 0.659   |             |               |

**Table S5.** Quantification of arbuscular mycorrhizal (AM) extraradical mycelium in soils with truffle-oak growing together with AM lavender, sage or thyme. AM mycelium quantification is relative to each species' control i.e., AM-lavender, AM-sage or AM-thyme growing alone, in which the quantity of AMF was considered as 100. Data are means  $\pm$  SE of relative gene expression and were calculated by  $\Delta\Delta C_T$  method.

| Treatment                 | Relative quantification of AMF |
|---------------------------|--------------------------------|
| truffle-oak + AM-lavender | 36.2 ± 9.5                     |
| truffle-oak + AM-sage     | 36.4 ± 6.1                     |
| truffle-oak + AM-thyme    | 33.4 ± 9.6                     |

**Table**

**S6.** Percentage of arbuscular mycorrhizas (AM) in roots of medicinal and aromatic plants (MAPs) growing alone or with truffle-oaks. Data are means ± SE.

| Treatment             | AMF mycorrhizas (%) |
|-----------------------|---------------------|
| AM-MAPs               | 57 ± 5.1            |
| truffle-oak + AM-MAPs | 65.6 ± 2.5          |

**Figure S3.** *Quercus ilex* roots colonized by a) *Tuber melanosporum* and b) arbuscular mycorrhizal fungi, from co-cultured plants collected at the end of the experiment.

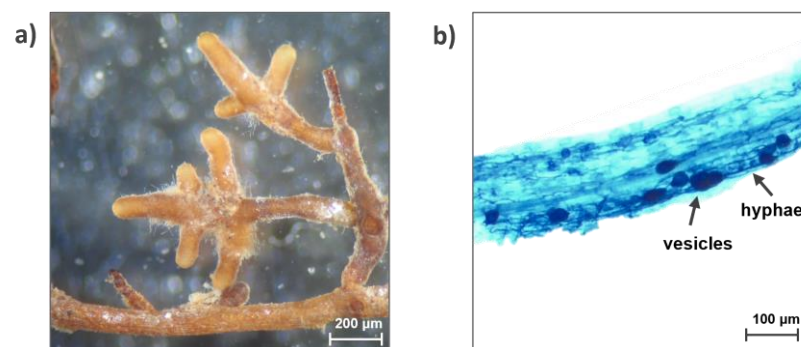

## References

37. Bodenhausen, N.; Deslandes-Héroid, G.; Waelchli, J.; Held, A.; van der Heijden, M.G.A.; Schlaeppli, K. Relative qPCR to Quantify Colonization of Plant Roots by Arbuscular Mycorrhizal Fungi. *Mycorrhiza* **2021**, *31*, 137–148, doi:10.1007/s00572-020-01014-1.
66. Toju, H.; Tanabe, A.S.; Yamamoto, S.; Sato, H. High-Coverage ITS Primers for the DNA-Based Identification of Ascomycetes and Basidiomycetes in Environmental Samples. *PLoS One* **2012**, *7*, e40863, doi:10.1371/journal.pone.0040863.
67. Pérez-Izquierdo, L.; Morin, E.; Maurice, J.P.; Martin, F.; Rincón, A.; Buée, M. A New Promising Phylogenetic Marker to Study the Diversity of Fungal Communities: The *Glycoside Hydrolase* 63 Gene. *Mol Ecol Res* **2017**, *17*, e1–e11, doi:10.1111/1755-0998.12678.
68. Tao, Y.; van Peer, A.F.; Huang, Q.; Shao, Y.; Zhang, L.; Xie, B.; Jiang, Y.; Zhu, J.; Xie, B. Identification of Novel and Robust Internal Control Genes from *Volvariella volvacea* That Are Suitable for RT-QPCR in Filamentous Fungi. *Sci Rep* **2016**, *6*, 29236, doi:10.1038/srep29236.
